# Supplementary material
Source: Springer Nature journal article supplement (https://www.springermedizin.de/resource/supplementary/13032_2014_79_MOESM1_ESM.pdf/9651612)

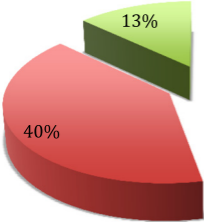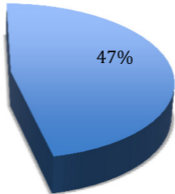

- Resident
- Specialist
- Consultant

Supplement: MOESM1 [file 9651612]
